# Supplementary material
Source: MDPI journal article supplement (https://www.mdpi.com/2076-3417/12/1/6)
Supplement: s1 [file s1]

**Annexure I Proforma for data collection for Project title: A Comparative Study To Evaluate The Effect Of Olive oil, Black seed powder, Honey, Nano-biofusion Gel Alvogly And Zinc Oxide Dressing For The Treatment Of Dry Socket: A Double Blind Randomised Control Study (Project No. 2130948162)**

Patient Name \_\_\_\_\_ Age \_\_\_\_\_ Gender \_\_\_\_\_ File no \_\_\_\_\_  
Address \_\_\_\_\_

Tooth extracted \_\_\_\_\_ Evidence of Dry socket: Present ☐ Absent ☐

Method of Extraction: Surgical Extraction / Non Surgical Extraction

Pre-existing periapical infection evident on a radiograph: Yes ☐ No ☐

Pre-existing Medical Conditions \_\_\_\_\_

Medication \_\_\_\_\_

History of Menstrual cycle (Female Patient only): Days \_\_\_\_\_ Pregnancy if present: Trimester [1] [2] [3]

History of Smoking: Yes ☐ No ☐

Did you smoke after tooth extraction? Yes ☐ No ☐

If yes when and how much? \_\_\_\_\_

Did you drink any fluid or juice or soft drinks through a straw? Yes ☐ No ☐

Did you rinse your mouth immediately after tooth extraction? Yes ☐ No ☐

On a Scale of 0 to 10 how much would you score your existing pain where 0 is no pain and 10 is maximum unbearable pain.

VAS: 0---2---3---4---5---6---7---8---9---10 Pain frequency \_\_\_\_\_ (Date \_\_\_\_\_)

Days till complete relief from symptoms \_\_\_\_\_

Numbers of repeated medication required till complete relief from symptoms \_\_\_\_\_

RESULTS noted after 2 weeks with trial medication group: [A] [B] [C] [D] [E] [F]

Excellent: Complete relief of pain without use of analgesics

Good : Complete relief of pain with modest use of analgesics (200mg Ibuprofen).

Fair: Complete relief of pain with moderate use of analgesics (400mg Ibuprofen).

Poor: Continued pain despite high dose of analgesics (600mg Ibuprofen).

Any side effects observed by the patient during the treatment period \_\_\_\_\_
